# Supplementary material
Source: PubMed Central journal article supplement (PMC8567841)
Supplement: NIHMS1742527-supplement-1742527_img_SD_Fig_1.pdf [file NIHMS1742527-supplement-1742527_img_SD_Fig_1.pdf]

*Drosophila* midguts stained for *btl>srcGFP* (trachea), DAPI (nuclei), pH3 (mitosis)

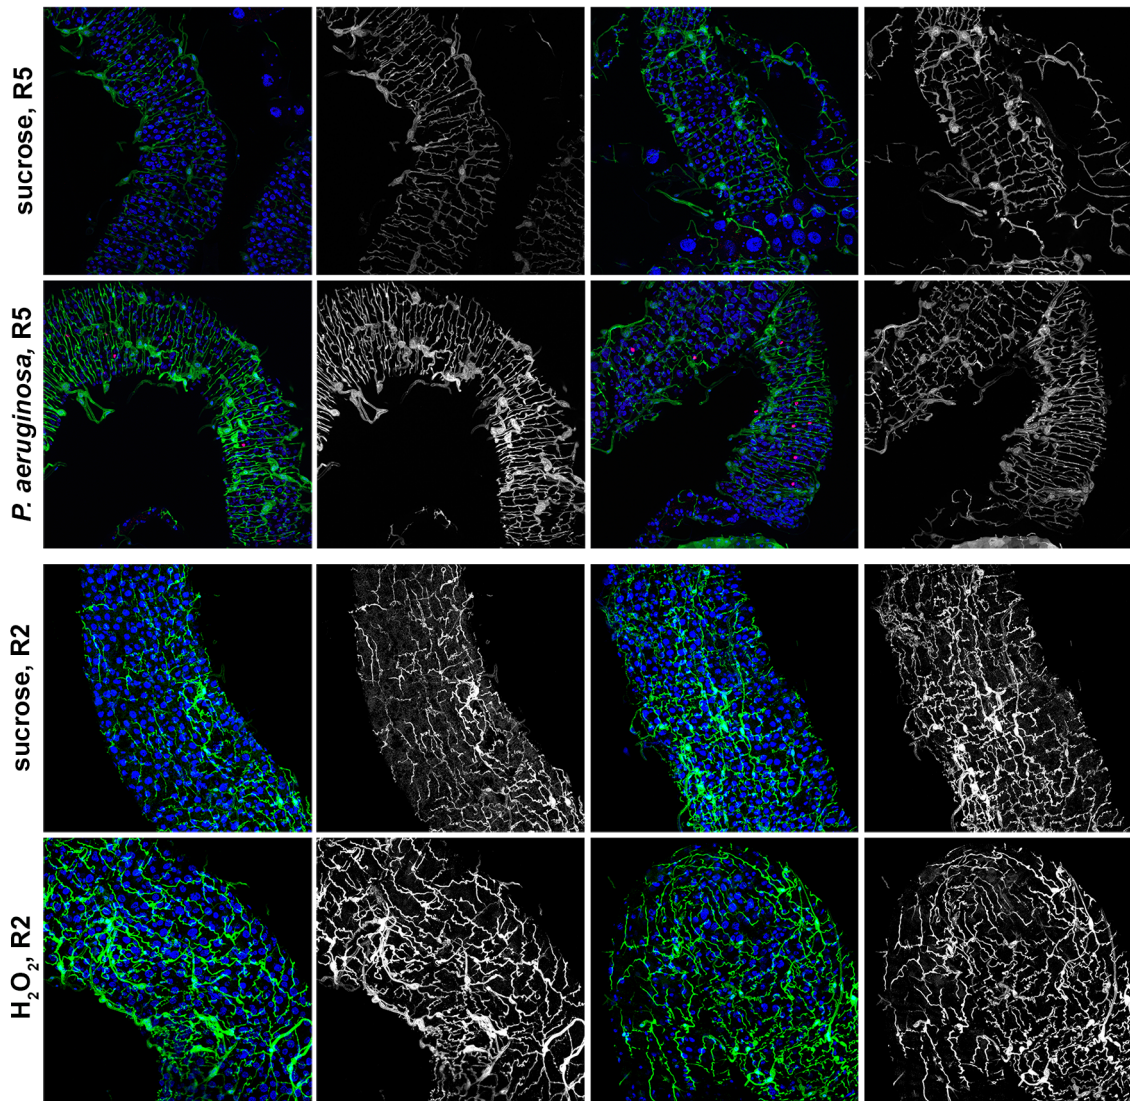

*Drosophila* midguts stained for *QF6>QUAS-mtdTomato* (trachea), DAPI (nuclei)

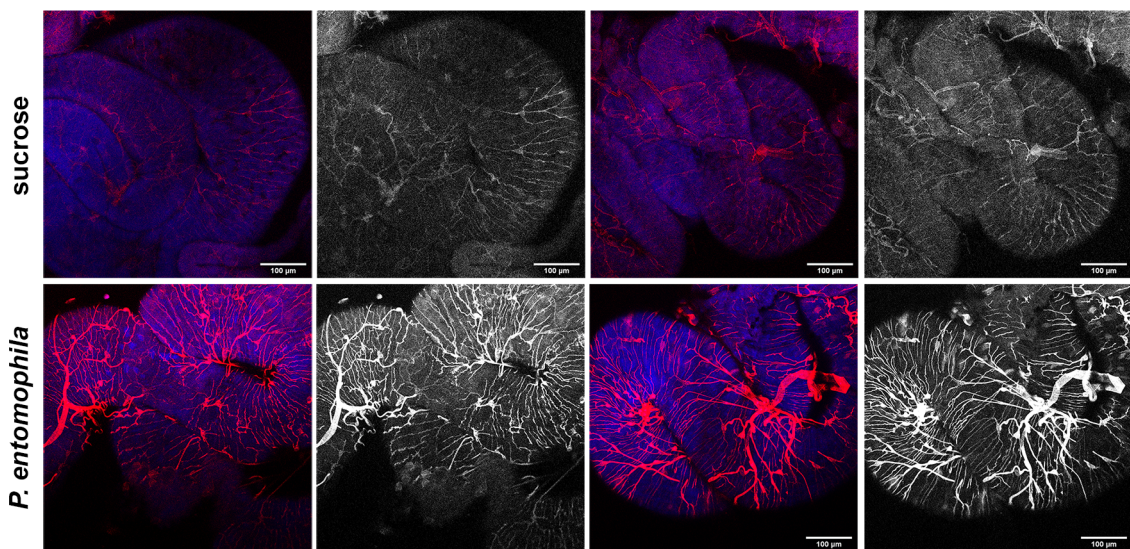

*Pseudomonas* infection and ROS induce tracheogenesis
