# Supplementary material
Source: PubMed Central journal article supplement (PMC8567841)
Supplement: NIHMS1742527-supplement-1742527_img_SD_Fig_5.pdf [file NIHMS1742527-supplement-1742527_img_SD_Fig_5.pdf]

posterior midgut

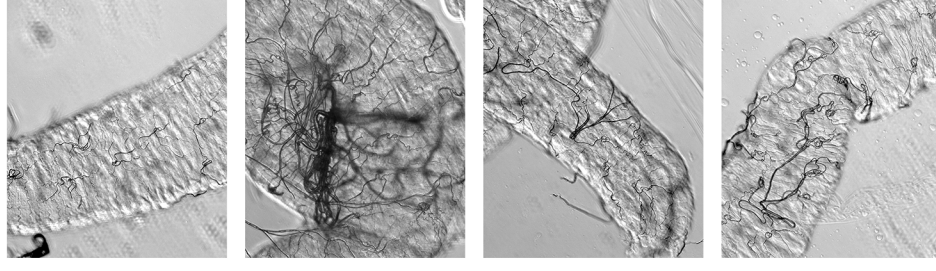

anterior midgut

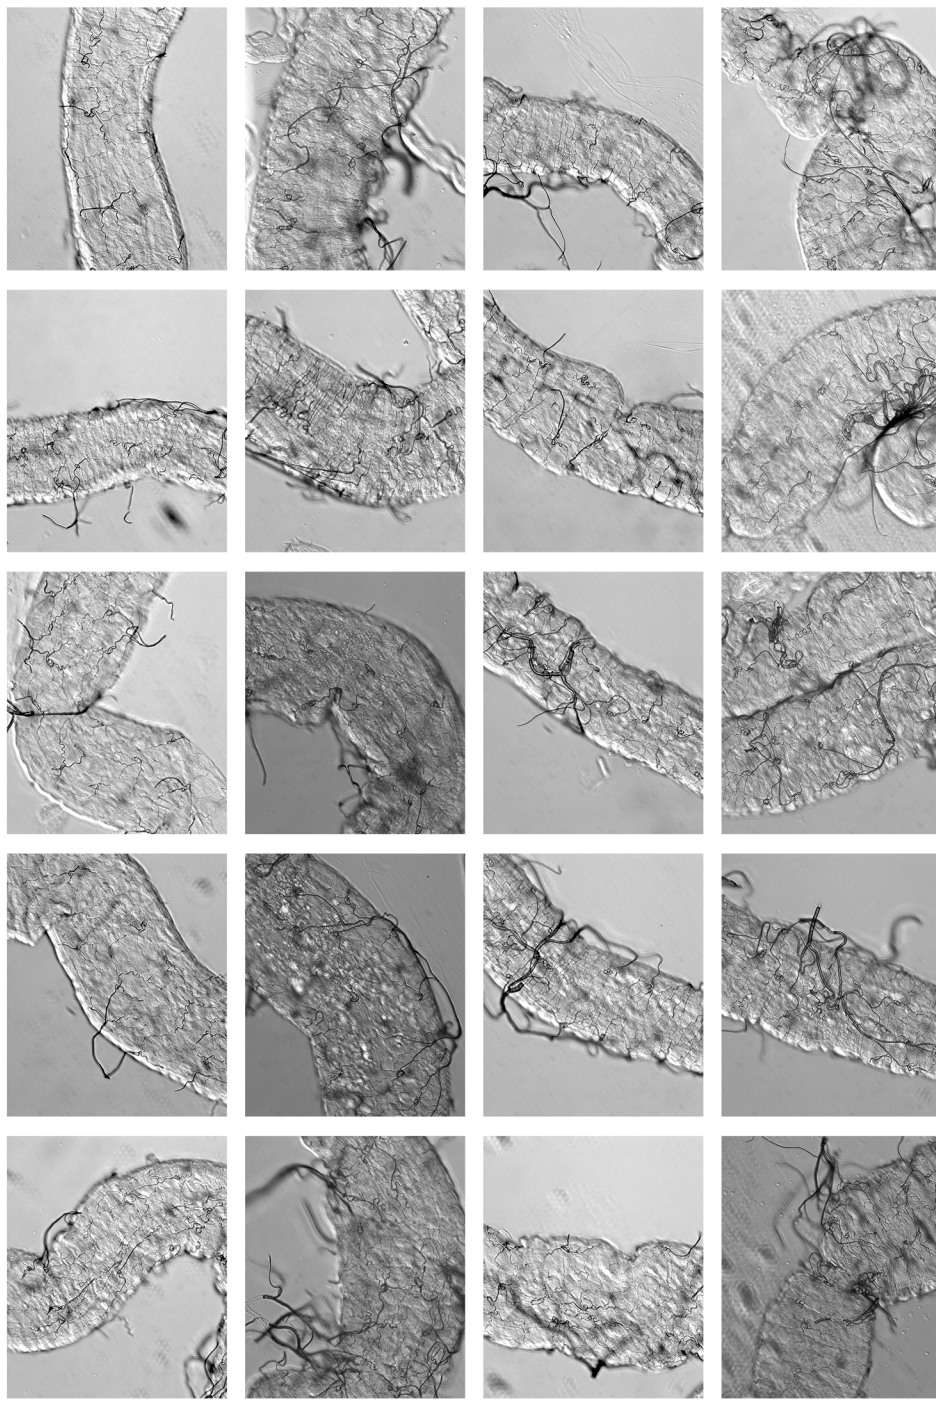

21% O<sub>2</sub>

5% O<sub>2</sub>

sucrose

21% O<sub>2</sub>

5% O<sub>2</sub>

*P. aeruginosa*

Midgut tracheogenesis upon hypoxia and infection
