# Supplementary material
Source: PubMed Central journal article supplement (PMC8567841)
Supplement: NIHMS1742527-supplement-1742527_img_SD_Fig_7.pdf [file NIHMS1742527-supplement-1742527_img_SD_Fig_7.pdf]

***Ras*<sup>V12</sup> MARCM with associated tracheae in BF**

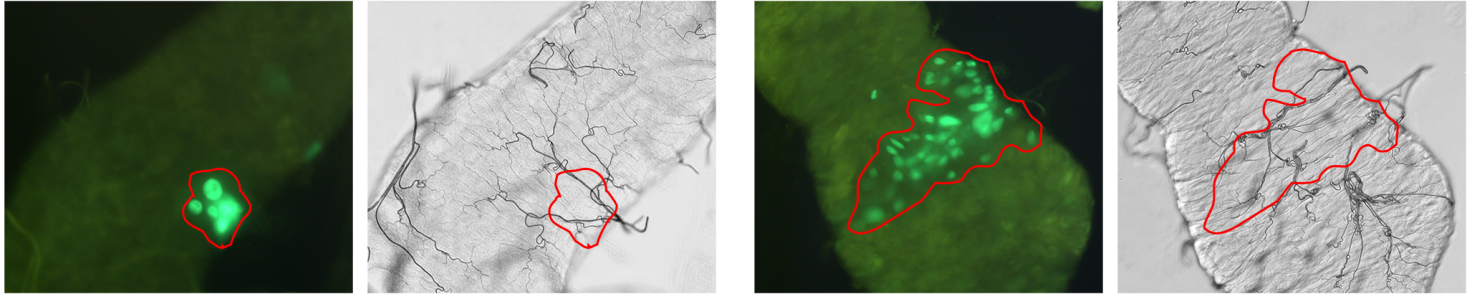

***neur*<sup>1</sup> MARCM with associated tracheae in BF**

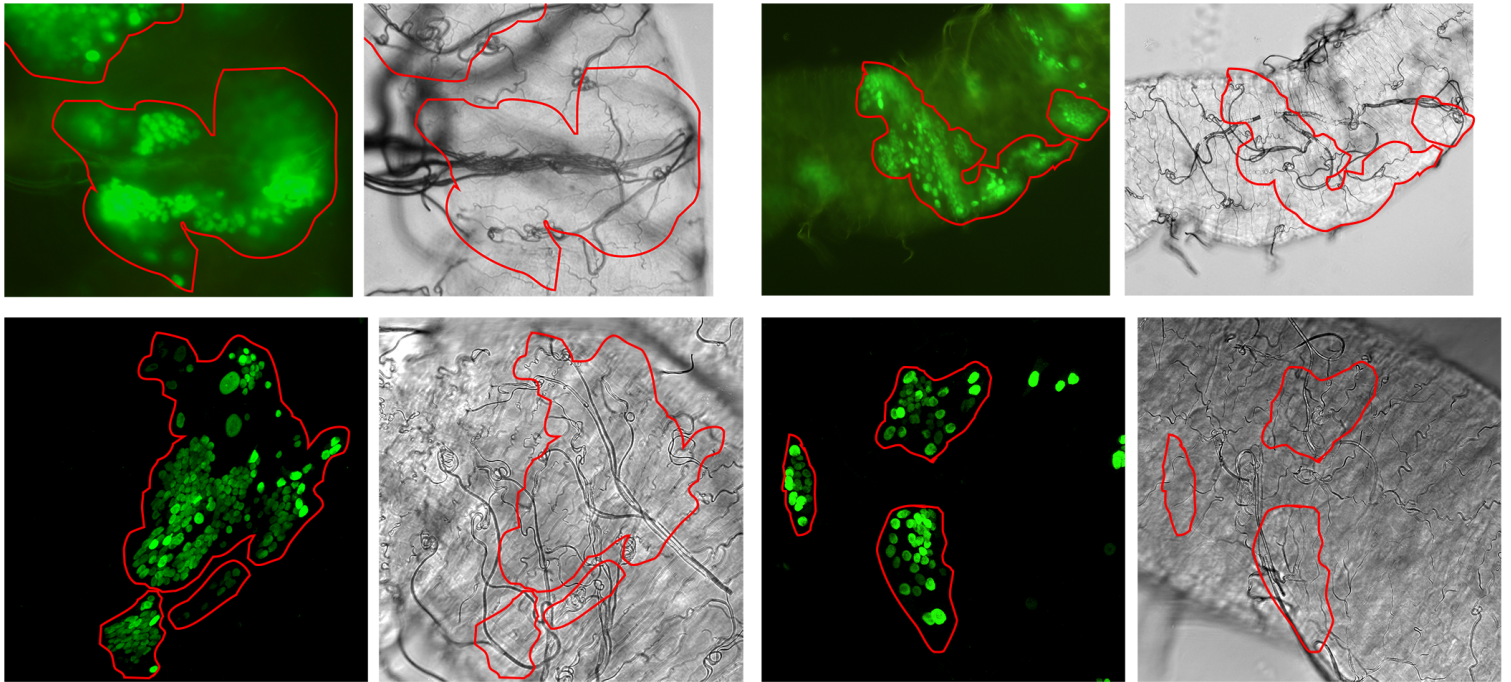

**Examples of midgut tumors and their associated tracheae**
